# Supplementary material for: Enhanced electrocatalytic glucose oxidation assisted hydrogen production via the interfacial synergistic effect of NiO/NiCo2O4 porous nanowires
Source: Royal Society of Chemistry journal article supplement (doi:10.1039/d4gc01860e), 2024-01-01
Supplement: d4gc01860e1.pdf [file d4gc01860e1.pdf]

## Supporting Information

### **Enhanced electrocatalytic glucose oxidation assisted hydrogen production via interfacial synergistic effect of NiO/NiCo<sub>2</sub>O<sub>4</sub> porous nanowire**

Zongxi Zhang <sup>a,b</sup>, Jiancheng Zhao <sup>a,b</sup>, Mei Hong, <sup>a,b</sup> Shuai Chen <sup>\* a,b</sup>, Yan Qiao <sup>\*a,b</sup>

<sup>a</sup> State Key Laboratory of Coal Conversion, Institute of Coal Chemistry, Chinese Academy of Sciences, 27 South Taoyuan Road, Taiyuan 030001, China

<sup>b</sup> Center of Materials Science and Optoelectronics Engineering, University of Chinese Academy of Sciences, Beijing 100049, China

Corresponding Author E-mail: chenshuai@sxicc.ac.cn, qiaoy@sxicc.ac.cn

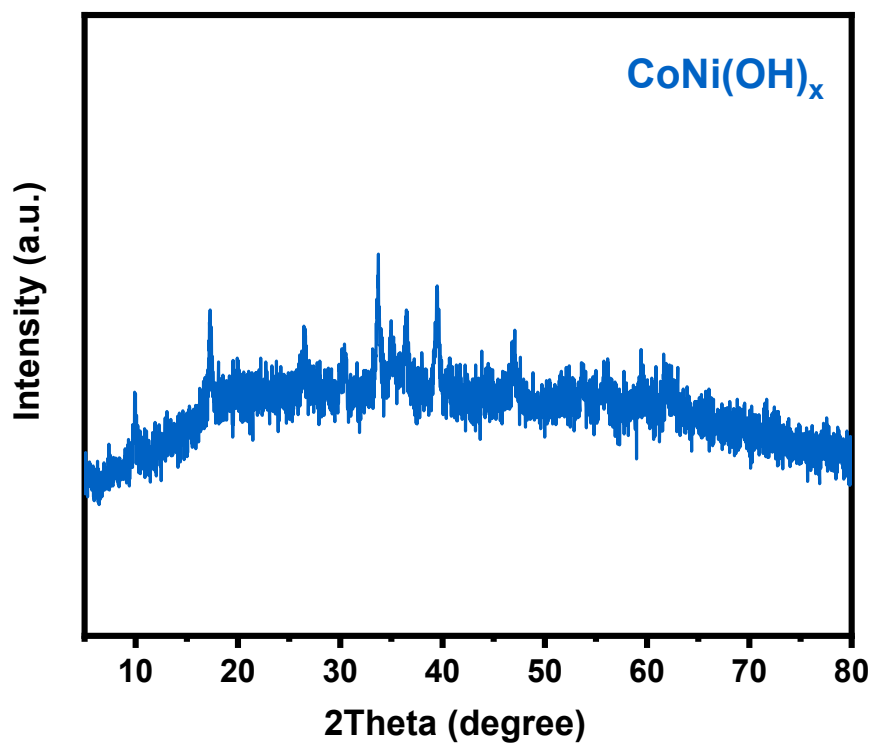

**Fig. S1.** XRD patterns of  $\text{CoNi(OH)}_x$ .

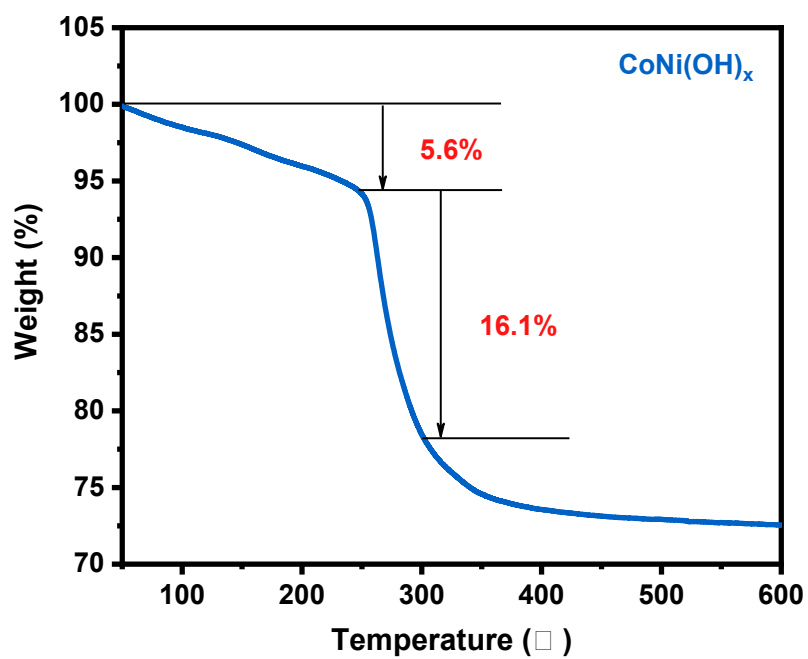

**Fig. S2.** TG analysis of the  $\text{CoNi(OH)}_x$ .

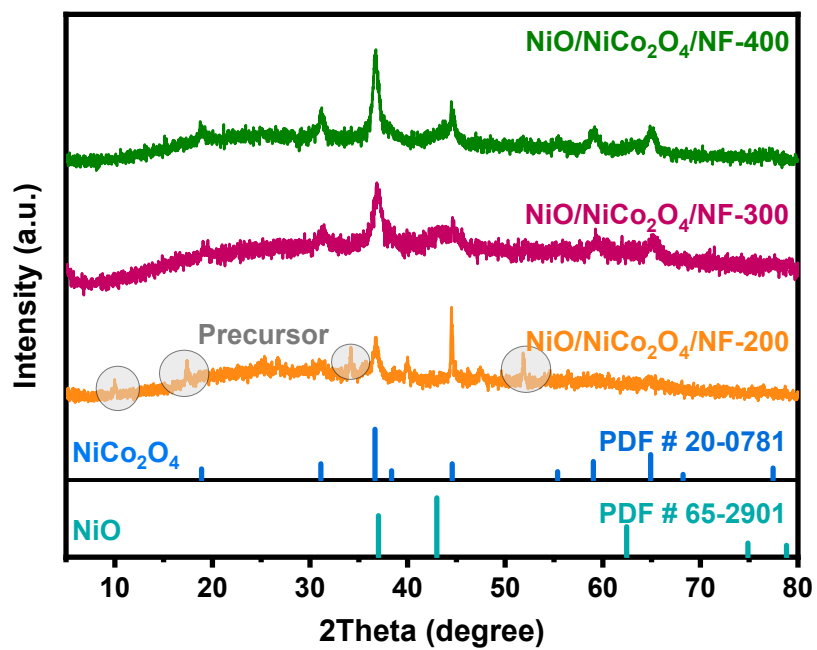

**Fig. S3.** XRD patterns of NiO/NiCo<sub>2</sub>O<sub>4</sub>/NF-X (X = 200, 300, 400).

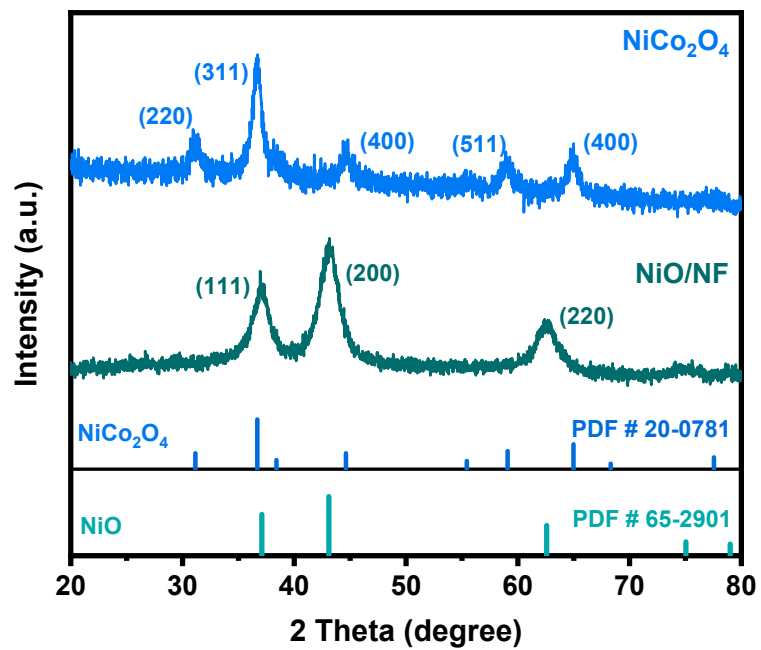

Fig. S4. XRD patterns of NiO/NF and NiCo<sub>2</sub>O<sub>4</sub>.

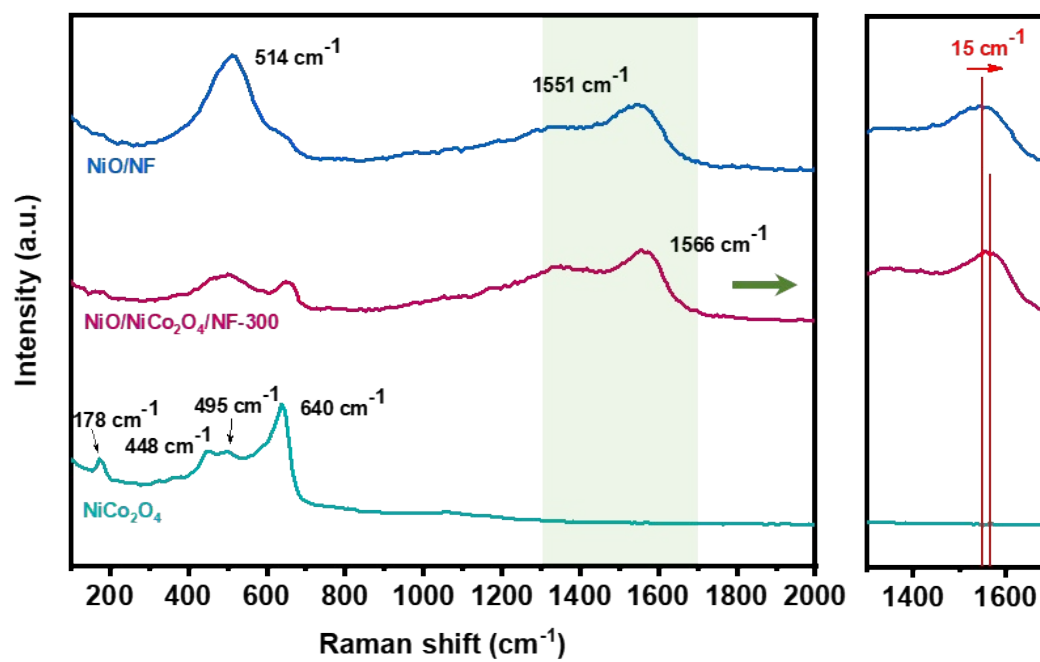

Fig. S5. Raman spectra of NiCo<sub>2</sub>O<sub>4</sub>, NiO/NiCo<sub>2</sub>O<sub>4</sub>/NF-300 and NiO.

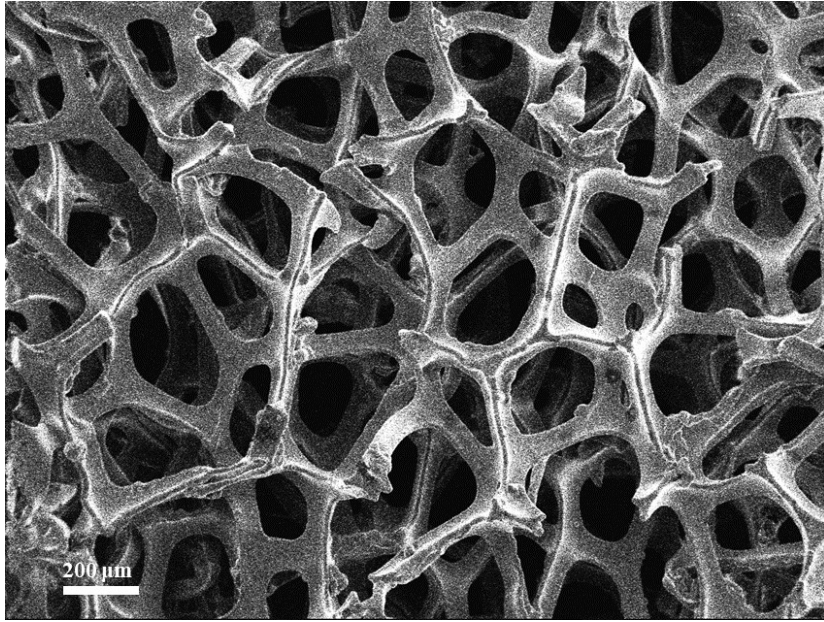

**Fig. S6.** SEM image of Ni foam.

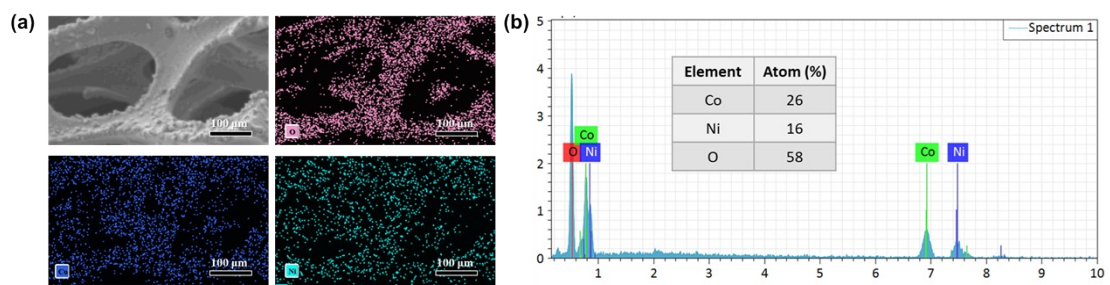

**Fig. S7.** (a) SEM image, corresponding elements mapping results and (b) the energy dispersive spectroscopy (EDS) of NiO/NiCo<sub>2</sub>O<sub>4</sub>/NF-300.



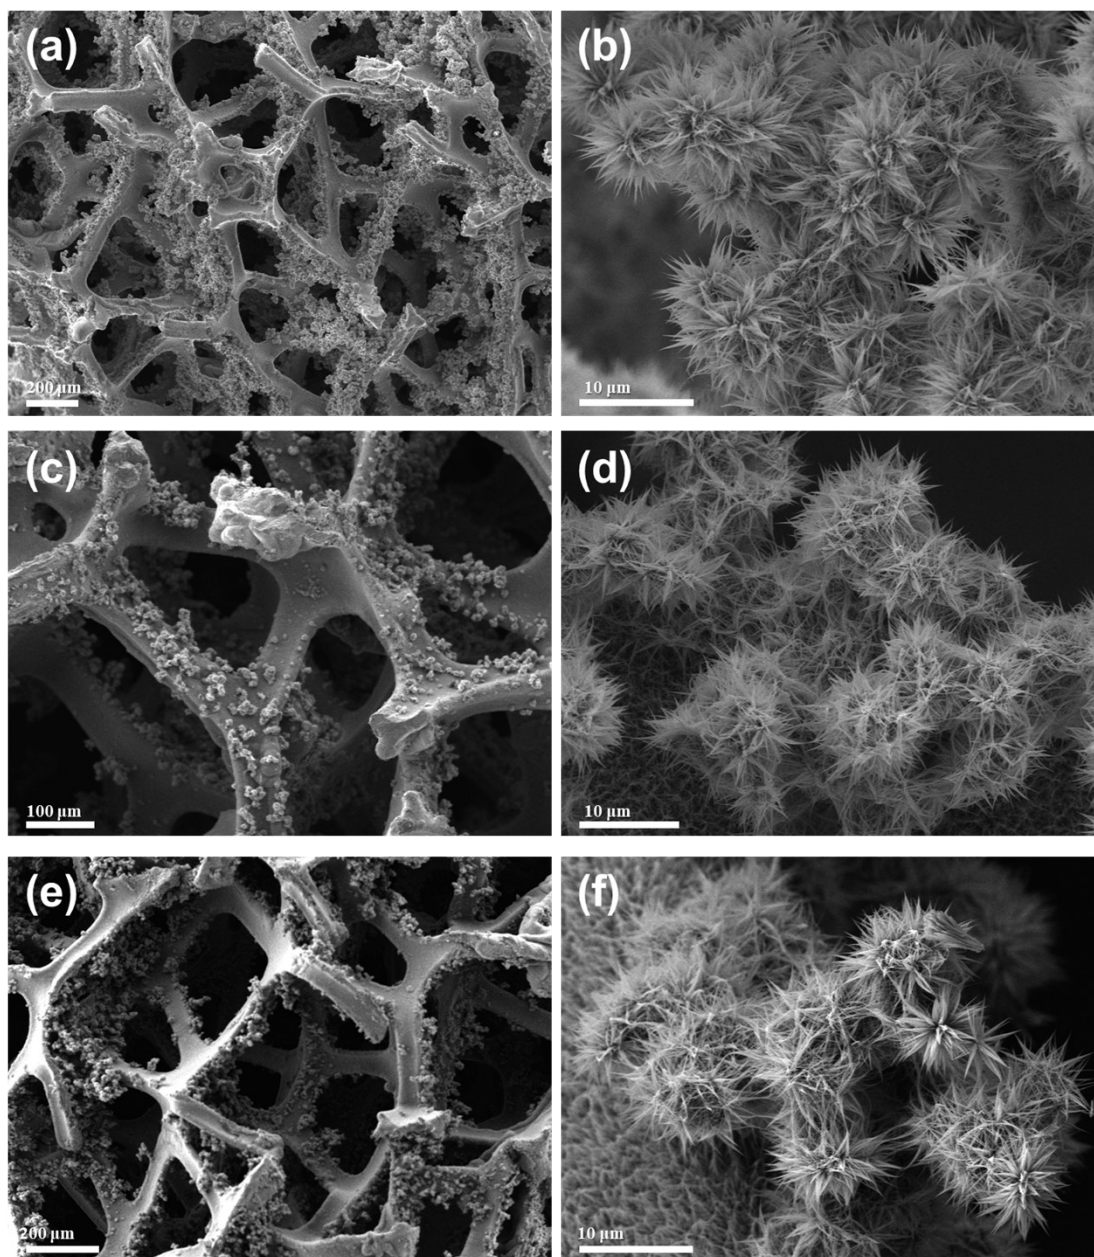

**Fig. S8.** SEM images of (a, b)  $\text{CoNi(OH)}_x/\text{NF}$ , (c, d)  $\text{NiO/NiCo}_2\text{O}_4/\text{NF-200}$  and (e, f)  $\text{NiO/NiCo}_2\text{O}_4/\text{NF-400}$ .

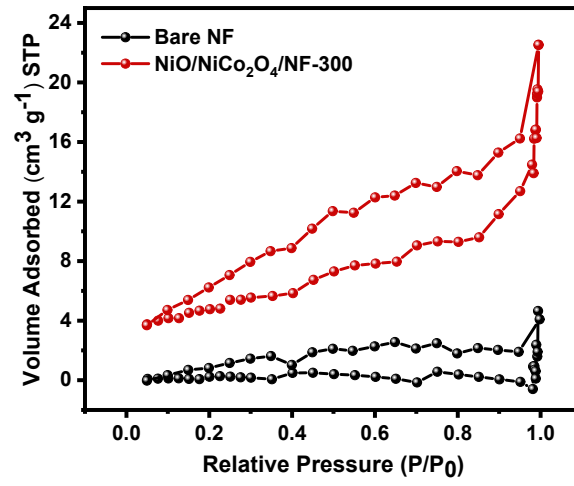

**Fig. S9.** N<sub>2</sub> adsorption-desorption isotherms of NiO/NiCo<sub>2</sub>O<sub>4</sub>/NF-300 and bare NF.

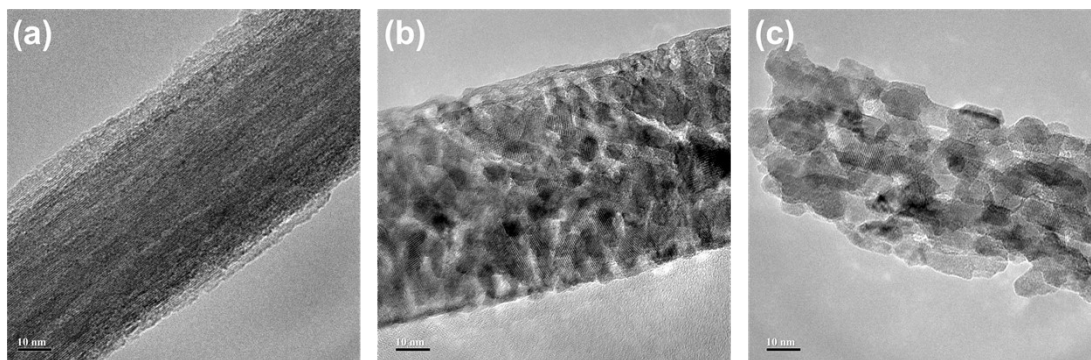

**Fig. S10.** TEM images of (a) NiO/NiCo<sub>2</sub>O<sub>4</sub>/NF-200, (b) NiO/NiCo<sub>2</sub>O<sub>4</sub>/NF-300 and (c) NiO/NiCo<sub>2</sub>O<sub>4</sub>/NF-400.

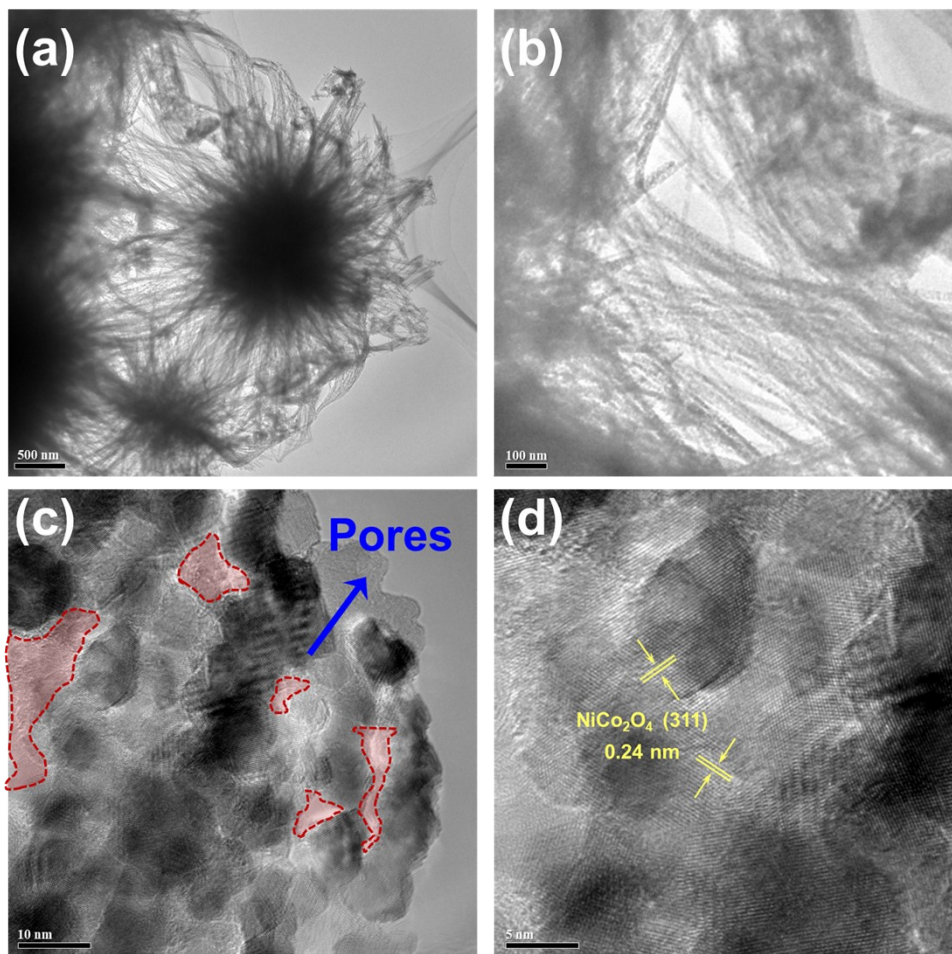

**Fig. S11.** TEM images of  $\text{NiCo}_2\text{O}_4$ .

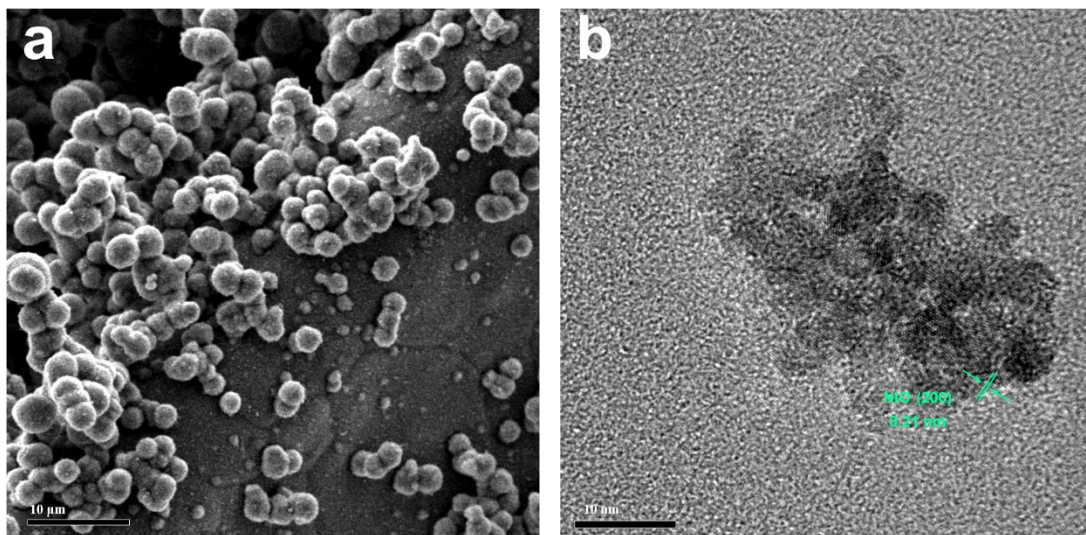

**Fig. S12.** (a) SEM image and (b) TEM image of NiO/NF.

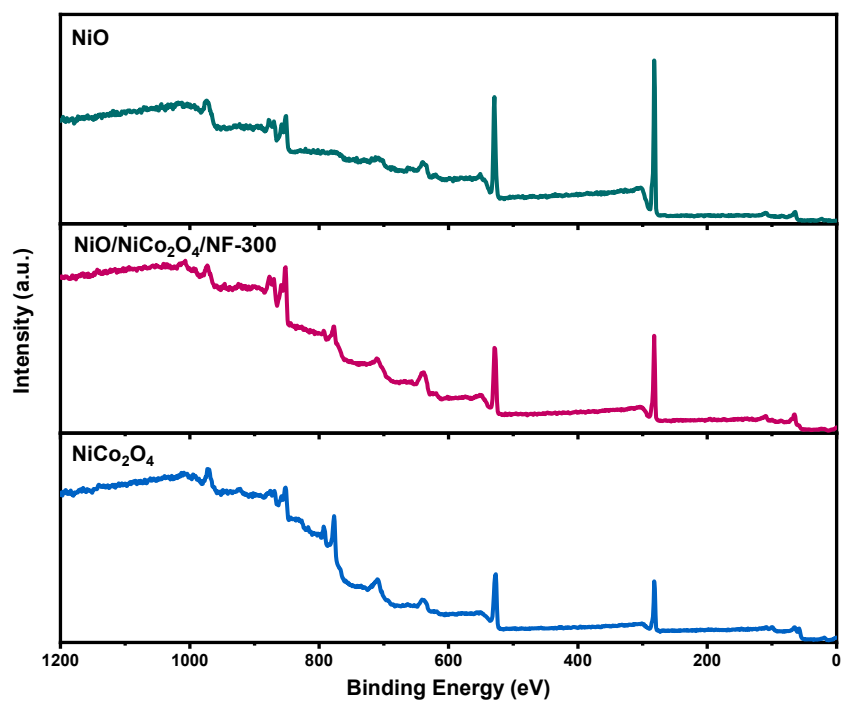

**Fig. S13.** XPS spectra of NiCo<sub>2</sub>O<sub>4</sub>, NiO/NiCo<sub>2</sub>O<sub>4</sub>/NF-300 and NiO.

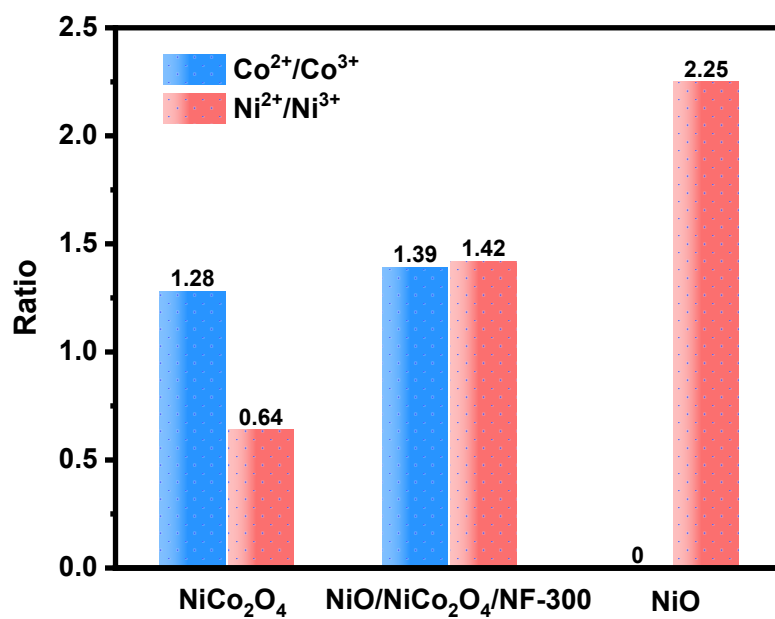

**Fig. S14.** The  $\text{Co}^{2+}/\text{Co}^{3+}$  and  $\text{Ni}^{2+}/\text{Ni}^{3+}$  ratios obtained from XPS of the corresponding samples.

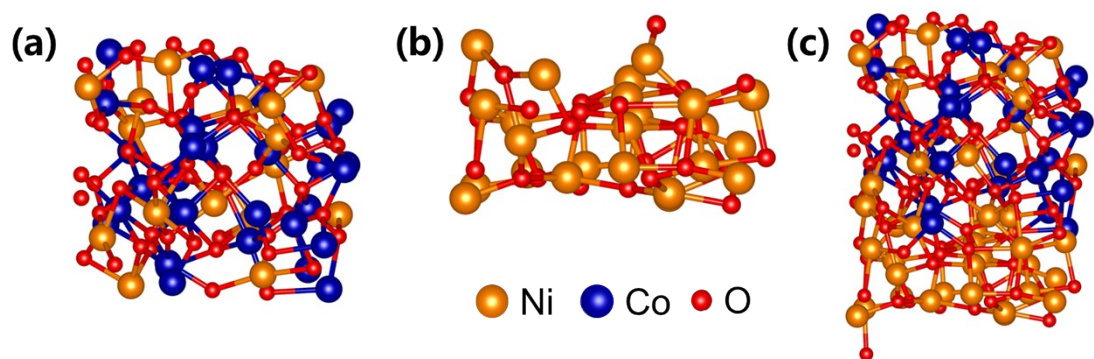

**Fig. S15.** The theoretical models of the optimized configurations of (a)  $\text{NiCo}_2\text{O}_4$ , (b)  $\text{NiO}$  and (c)  $\text{NiO/NiCo}_2\text{O}_4$  heterojunction.



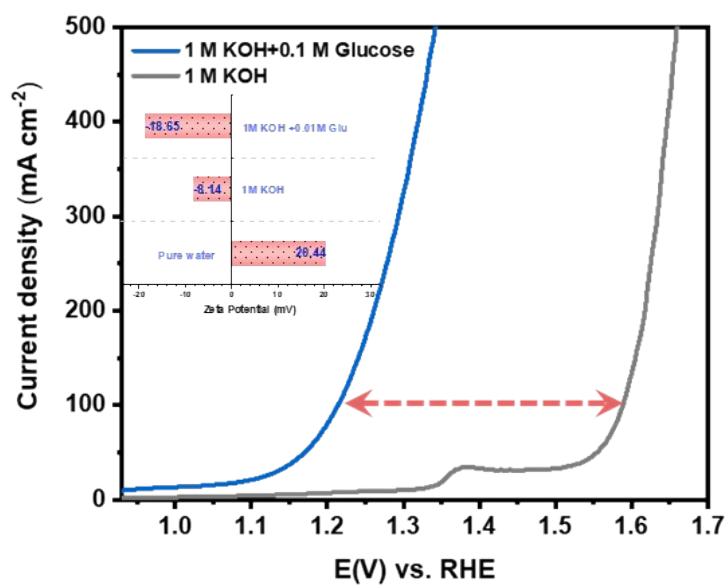

**Fig. S16.** the corresponding LSV curves of NiO/NiCo<sub>2</sub>O<sub>4</sub>/NF-300 with and without 0.1 M glucose in 1.0 M KOH (inset shows the corresponding zeta potential in different environments).

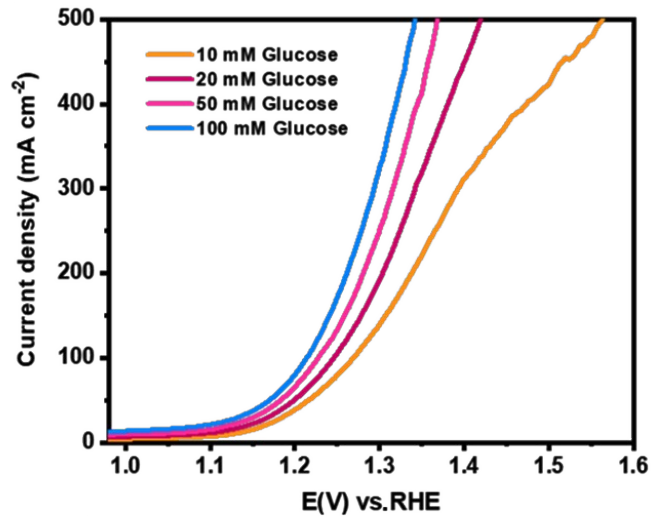

**Fig. S17.** LSV curves of NiO/NiCo<sub>2</sub>O<sub>4</sub>/NF-300 at different glucose concentrations.

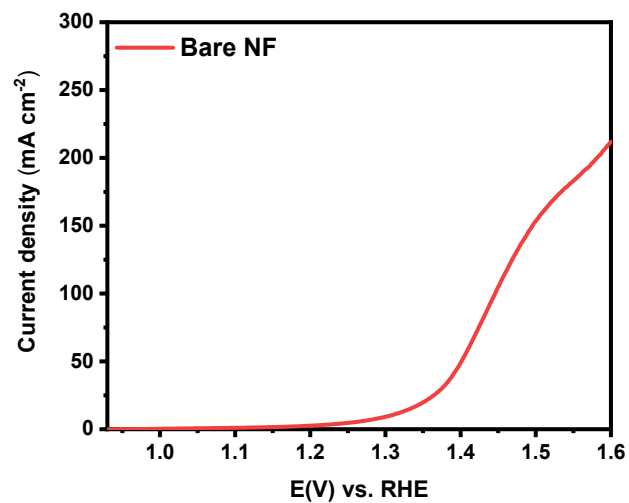

**Fig. S18.** LSV curves of bare NF with 0.1 M glucose in 1.0 M KOH.

**Table S1.** Comparison of our catalyst with the reported catalysts for electrochemical saccharides oxidation

| Electrocatalyst                                                | Electrolyte                     | Potential<br>(V vs. RHE) | $j$<br>(mA cm <sup>-2</sup> ) | Ref.                 |
|----------------------------------------------------------------|---------------------------------|--------------------------|-------------------------------|----------------------|
| NiFeO <sub>x</sub> -NF                                         | 1 M KOH + 50 mM glucose         | 1.30                     | 61.5                          | 1                    |
| Fe <sub>0.1</sub> -CoSe <sub>2</sub> /CC                       | 1 M KOH + 500 mM glucose        | 1.35                     | 100                           | 2                    |
| Fe <sub>2</sub> P/SSM                                          | 1 M KOH + 500 mM glucose        | 1.33                     | 100                           | 3                    |
| Ru@Ni-B/NF                                                     | 1 M KOH + 100 mM glucose        | 1.24                     | 10                            | 4                    |
| Co <sub>9</sub> S <sub>8</sub> /Ni <sub>3</sub> S <sub>2</sub> | 1 M KOH + 50 mM xylose          | 1.27                     | 100                           | 5                    |
| NiCoP                                                          | 1 M KOH + 100 mM xylose         | 1.29                     | 100                           | 6                    |
| Ni-MoS <sub>2</sub> NPs                                        | 1 M KOH + 300 mM glucose        | 1.46                     | 10                            | 7                    |
| NiVP/Pi-VC                                                     | 1 M KOH + 100 mM glucose        | 1.3                      | 10                            | 8                    |
| CNT@Co/CoP                                                     | 1 M KOH + 500 mM glucose        | 1.42                     | 10                            | 9                    |
| Co@NPC                                                         | 1 M KOH + 100 mM glucose        | 1.46                     | 10                            | 10                   |
| CoWO <sub>4</sub>                                              | 1 M KOH + 100 mM glucose        | 1.44                     | 10                            | 11                   |
| <b>NiO/NiCo<sub>2</sub>O<sub>4</sub>/NF-<br/>300</b>           | <b>1 M KOH + 100 mM glucose</b> | <b>0.93</b>              | <b>10</b>                     | <b>This<br/>work</b> |
|                                                                |                                 | <b>1.21</b>              | <b>100</b>                    |                      |
|                                                                |                                 | <b>1.34</b>              | <b>500</b>                    |                      |

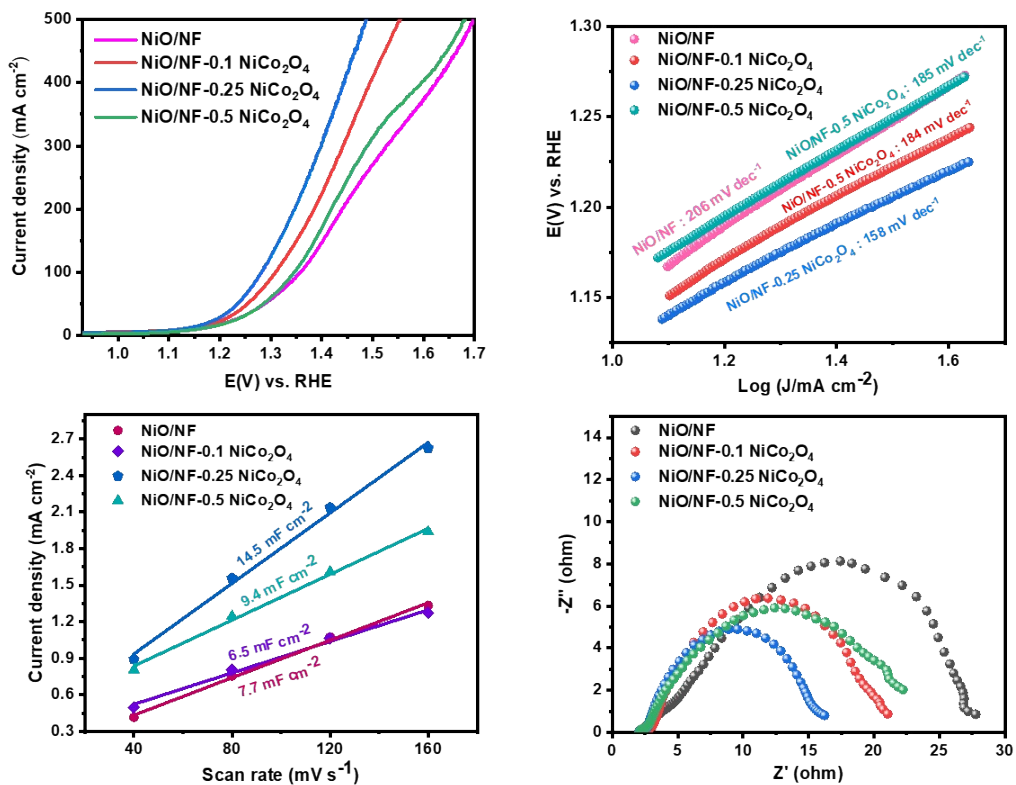

**Fig. S19.** (a) GOR LSV curves. (b) Tafel plots derived from the LSV curves in (a). (c) Electrochemical double-layer capacitances. (d) Nyquist plots of NiO/NF with different NiCo<sub>2</sub>O<sub>4</sub> loadings.

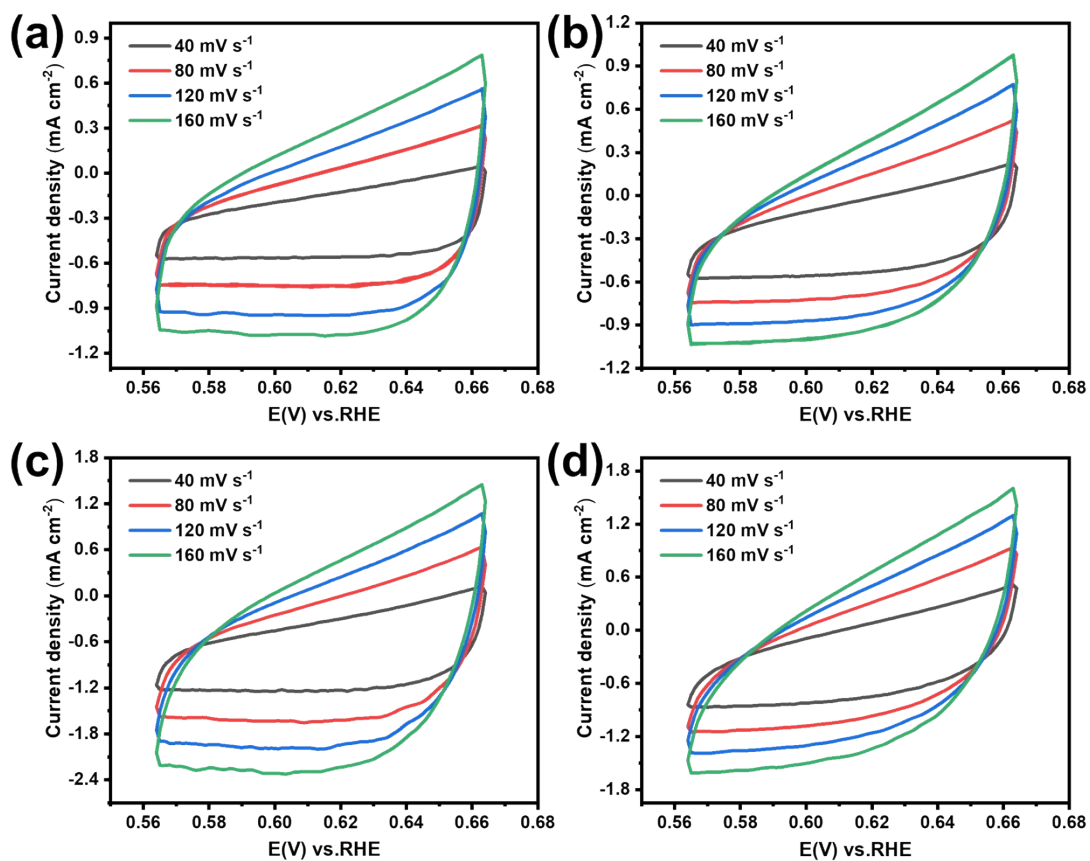

**Fig. S20.** CV curves of (a) NiO/NF, (b) NiO/NF-0.1 NiCo<sub>2</sub>O<sub>4</sub> and (c) NiO/NF-0.25 NiCo<sub>2</sub>O<sub>4</sub> (d) NiO/NF-0.5 NiCo<sub>2</sub>O<sub>4</sub> at different scan rates.

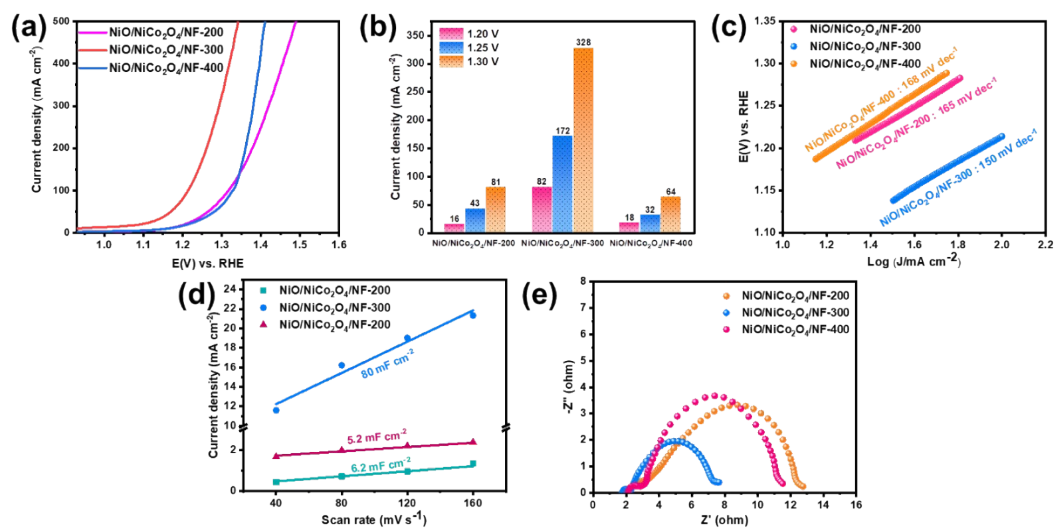

**Fig. S21.** (a) LSV curves. (b) Corresponding current densities at different potentials. (c) Tafel plots derived from the LSV curves in (a). (d) Electrochemical double-layer capacitances. (e) Nyquist plots of samples obtained at different calcination temperatures.

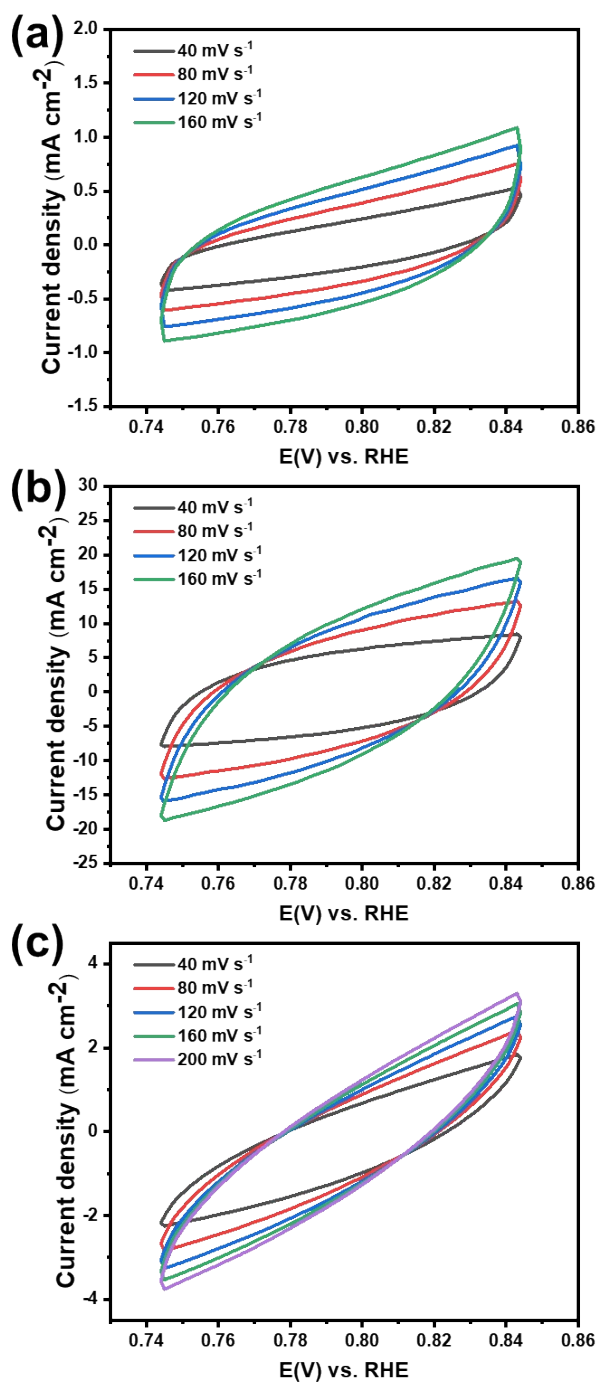

**Fig. S22.** CV curves of (a) NiO/NiCo<sub>2</sub>O<sub>4</sub>/NF-200, (b) NiO/NiCo<sub>2</sub>O<sub>4</sub>/NF-300 and (c) NiO/NiCo<sub>2</sub>O<sub>4</sub>/NF-400 at different scan rates.



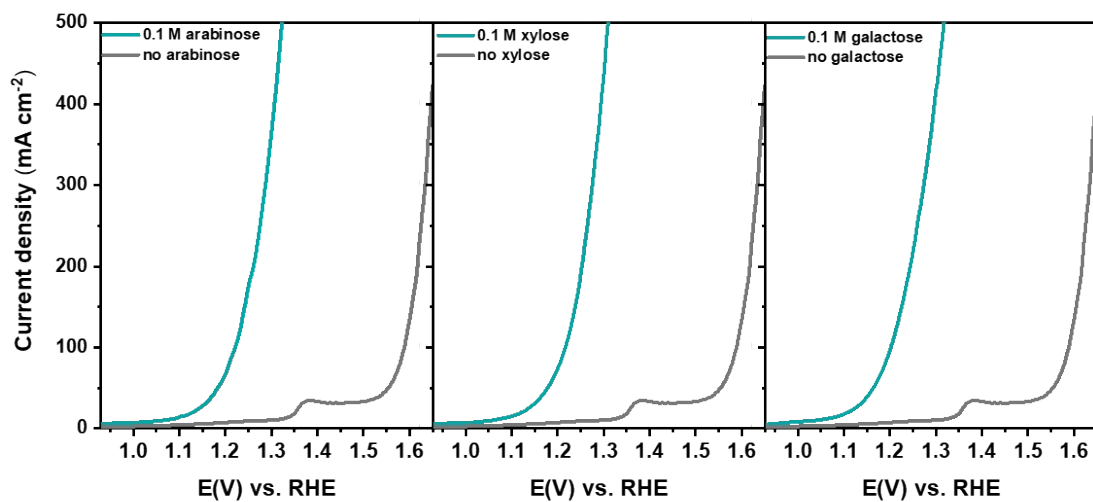

**Fig. S23.** The corresponding LSV curves of NiO/NiCo<sub>2</sub>O<sub>4</sub>/NF-300 with and without 0.1 M monosaccharide (galactose, xylose, arabinose) in 1.0 M KOH.

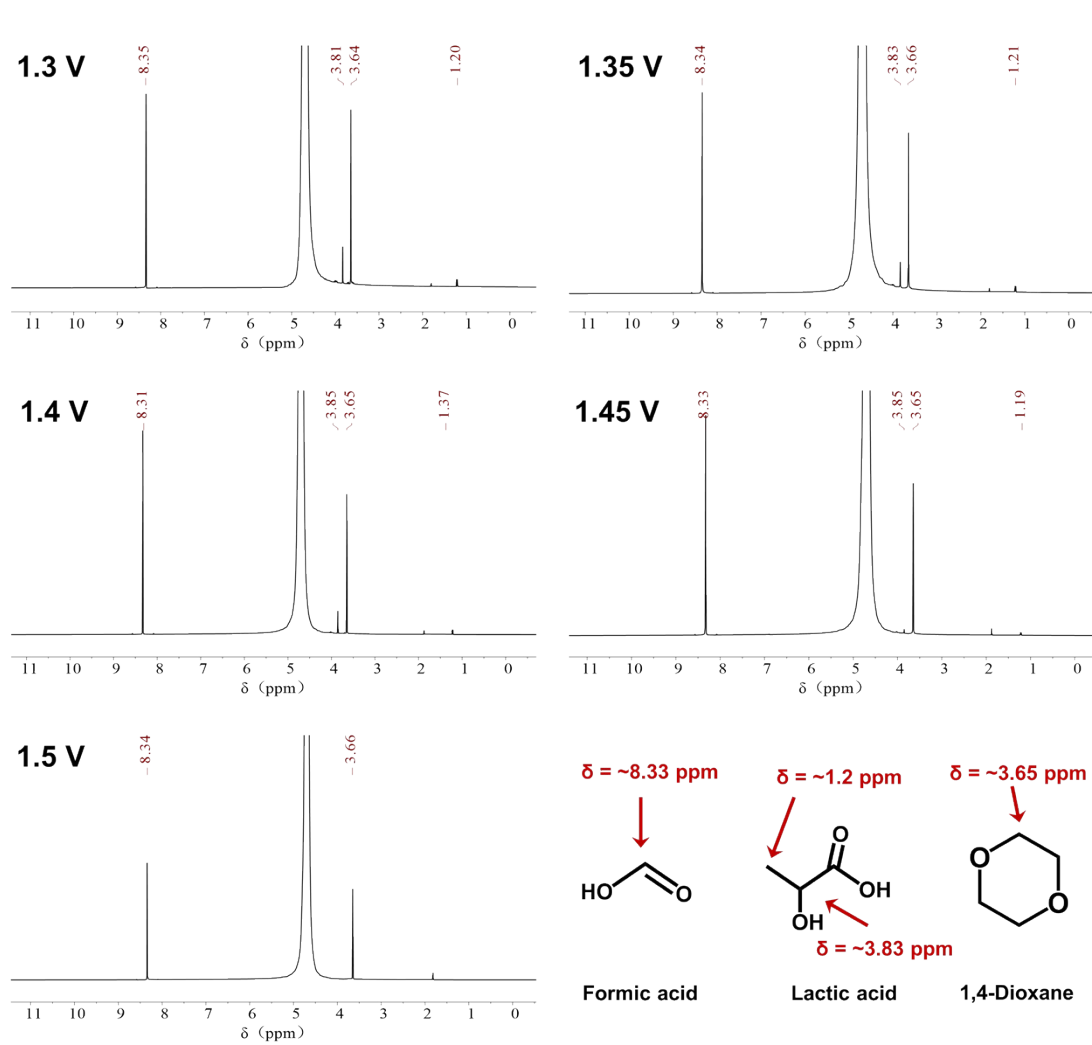

**Fig. S24.**  $^1\text{H}$  qNMR spectra of oxidized products in the electrolyte after 12 h electrolysis of glucose at 1.3 V, 1.35 V, 1.4 V, 1.45 V and 1.5 V.

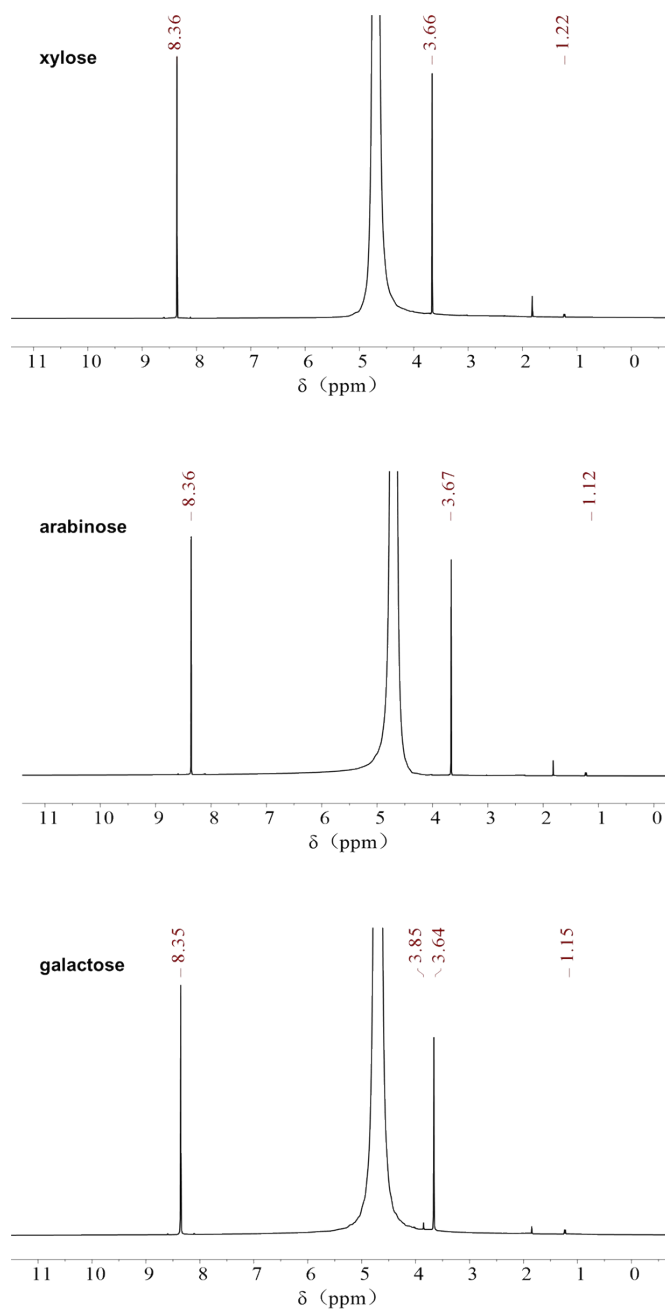

**Fig. S25.** <sup>1</sup>H qNMR spectra of oxidized products of xylose, galactose and arabinose in the electrolyte after electrolysis at 1.35 V for 12 h.

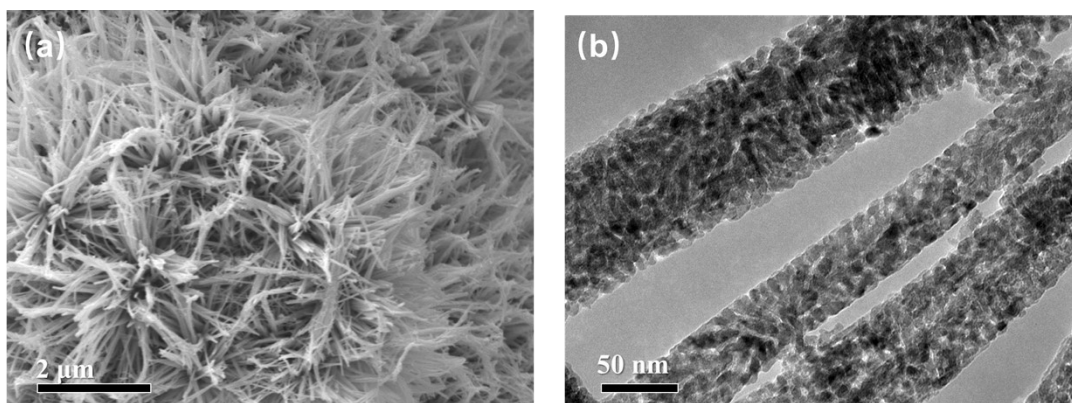

**Fig. S26.** (a) SEM and (b) TEM image of post-NiO/NiCo<sub>2</sub>O<sub>4</sub>/NF-300.

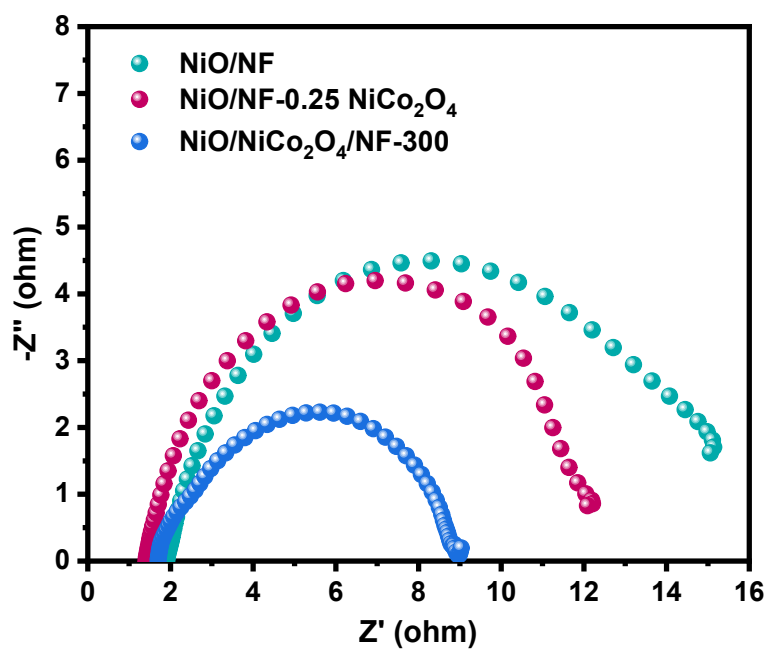

**Fig. S27.** Nyquist plots of NiO/NF, NiO/NF-0.25 NiCo<sub>2</sub>O<sub>4</sub> and NiO/NiCo<sub>2</sub>O<sub>4</sub>/NF-300.

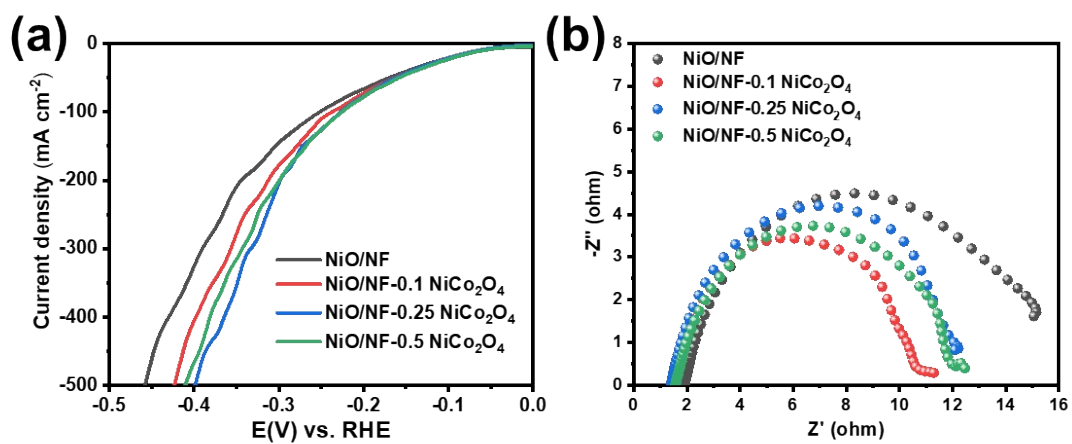

**Fig. S28.** (a) LSV curves. (b) Nyquist plots of samples with different NiCo<sub>2</sub>O<sub>4</sub> loadings.

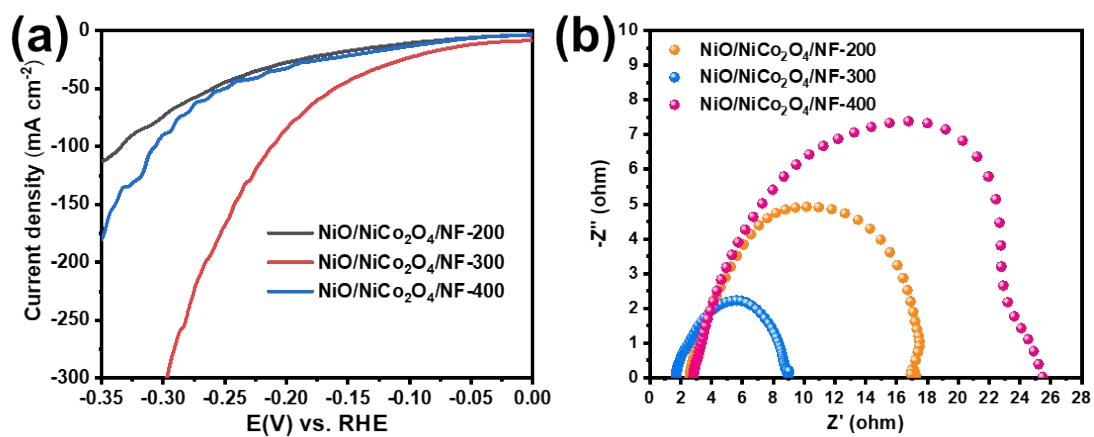

**Fig. S29.** (a) LSV curves. (b) Nyquist plots of samples obtained at different calcination temperatures.

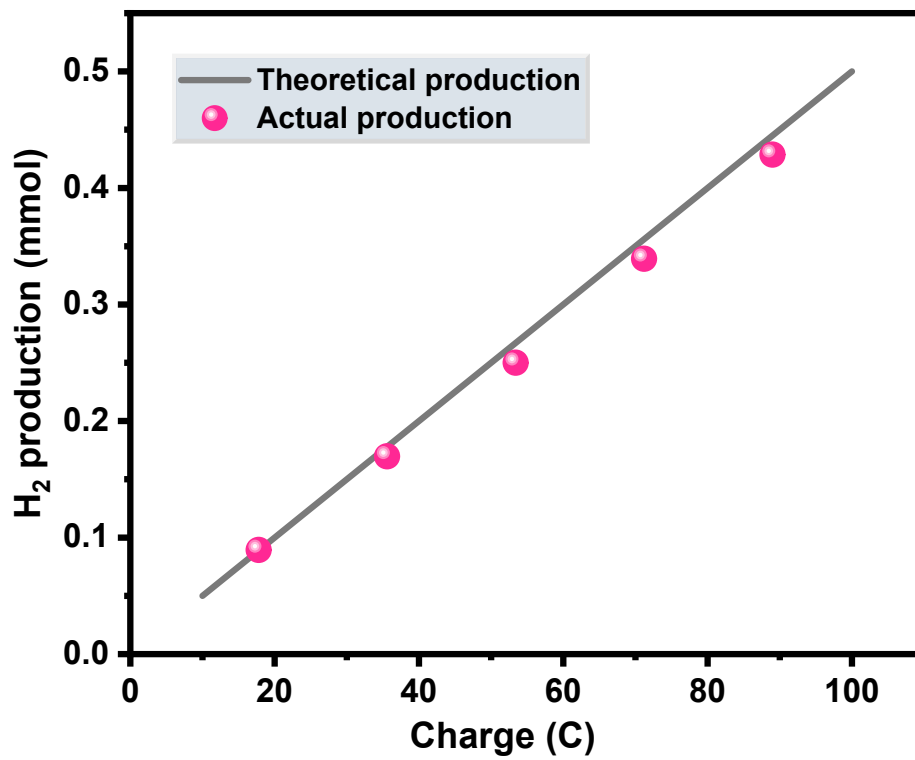

**Fig. S30.** Actual H<sub>2</sub> production compared with theoretically calculated H<sub>2</sub> production.



## References

1. W. J. Liu, Z. Xu, D. Zhao, X. Q. Pan, H. C. Li, X. Hu, Z. Y. Fan, W. K. Wang, G. H. Zhao, S. Jin, G. W. Huber and H. Q. Yu, *Nat. Commun.*, 2020, **11**, 265.
2. D. Zheng, J. Li, S. Ci, P. Cai, Y. Ding, M. Zhang and Z. Wen, *Appl. Catal. B: Environ.*, 2020, **277**, 119178.
3. P. Du, J. Zhang, Y. Liu and M. Huang, *Electrochem. commun.*, 2017, **83**, 11-15.
4. H. Liu, R. Zhang, L. Chen, L. Wang, Y. Guo and Y. Yang, *Adv. Sustain. Syst.*, 2021, **5**, 2000184.
5. Y. Liu, R. Zou, B. Qin, J. Gan and X. Peng, *Chem. Eng. J.*, 2022, **446**, 136950.
6. Y. Yang, R. Zou, J. Gan, Y. Wei, Z. Chen, X. Li, S. Admassie, Y. Liu and X. Peng, *Green Chem.*, 2023, **25**, 4104.
7. X. Liu, P. Cai, G. Wang and Z. Wen, *Int. J. Hydrog. Energy*, 2020, **45**, 32940-32948.
8. N. Thakur, D. Mehta, A. Chaturvedi, D. Mandal and T. C. Nagaiah, *J. Mater. Chem. A*, 2023, **11**, 15868.
9. Y. Zhang, Y. Qiu, Z. Ma, Y. Wang, Y. Zhang, Y. Ying, Y. Jiang, Y. Zhu and S. Liu, *J. Mater. Chem. A*, 2021, **9**, 10893.
10. D. Li, Y. Huang, Z. Li, L. Zhong, C. Liu and X. Peng, *Chem. Eng. J.*, 2022, **430**, 132783.
11. A. Chaturvedi, D. Gupta, S. Kaur, K. Garg and T. C. Nagaiah, *J. Mater. Chem. A*, 2023, **11**, 18280-18290.
